# Supplementary material
Source: publisher site journal article supplement (https://www.dovepress.com/get_supplementary_file.php?f=455378.docx)
Supplement: Supplementary file 1 [file get_supplementary_file.php]

Racial disparities in medication use during pregnancy: results from the NISAMI Cohort

# Supplementary Material

**Table S1.** Variables of study.

| **Variables** | **Measurement/Classification** | **Range** | **Code** |
| --- | --- | --- | --- |
| Maternal age | “How old are you?”  *Self-report* | 13 to 45 years | ≤ 24 years  25 to 29 years  30 to 35 years  ≥ 36 years |
| Race | “What is your race?”  *Self-report* | Asian, black,  Brazilian indigenous, brown, and white | Asian  Black  Brazilian indigenous  Brown  White |
| Education | “What was the highest grade you attended?”  *Self-report* | Number of complete years of formal study | ≤ 8 years  9 to 11 years  ≥ 11 years |
| Marital status | “Do you have a partner?”  *Self-report* | Yes/No | With a partner  Without a partner |
| Employment status | “How is your employment status?”  *Self-report* | Active  Unemployed  Stay-at-home mom  Student  Retired  Maternity leave/treatment | With employment  Without employment |
| Family income | “What is your monthly family income?”  According to the 2013 minimum wage (MW)  *Self-report* | One minimum wage (MW) in 2013: R$ 678.00 (US$ 301.33)* | ≤ 1 minimum wage  > 1 minimum wage |
| Smoking during pregnancy | “Did you smoke during this pregnancy?”  *Self-report* | Yes/No | Yes  No |
| Number of previous pregnancies | “How many previous pregnancies did you have?”  *Self-report* *and Prenatal services' clinical records* | 0 to 13 previous pregnancies | < 2 previous pregnancies  ≥ 2 previous pregnancies |
| Onset of prenatal care | “How many months of pregnancy did you have your 1st consultation?”  *Self-report and Prenatal services' clinical records* | 1 to 9 months of pregnancy | During the 1st trimester  After the 1st trimester |
| Number of prenatal consultations | “How many prenatal consultations have you had during this pregnancy?”  *Self-report and Prenatal services' clinical records* | 1 to 22 prenatal consultations | ≤ 3 prenatal consultations  > 3 prenatal consultations |
| History of miscarriage | “Have you ever had a miscarriage/lost the baby before birth?”  *Self-report and Prenatal services' clinical records* | Yes/No | Yes  No |
| Health problems | “Do you have anemia?”  “Do you have asthma?”  “Do you have diabetes?”  “Do you have hypertension?”  “Do you have kidney disease?”  “Do you have tuberculosis?”  “Did you have pneumonia during this pregnancy?”  “Did you have a urinary tract infection during this pregnancy?”  “Did you have bleeding during this pregnancy?”  *Self-report* | Yes/No (based on at least one positive answer) | Yes  No |
| Medication use during pregnancy | “Did you use any medication during this pregnancy for...: high blood pressure, diabetes (high blood sugar), pain or colic, nausea or vomiting, cough, vaginal discharge, infection, respiratory problems, and/or other reasons?".  *Self-report* | Yes/No (If pregnant women answered yes, they provided all their medications' names) | No  Yes |

* Estimated U.S. commercial dollar values based on the quote currency in July 2013 (US$ 1.00 = R$ 2.25).

**Table S2.** Characteristics of the study population. NISAMI Cohort Study, Brazil, 2012-2014 (N = 1,058).

|  | **Total (n = 1,058)** | |
| --- | --- | --- |
| **n** | **%** |
| **Maternal age (years)** |  |  |
| ≤ 24 | 485 | 45.84 |
| 25 to 29 | 284 | 26.84 |
| 30 to 35 | 219 | 20.70 |
| ≥ 36 | 69 | 6.52 |
| Missing | 1 | 0.09 |
| **Race/ethnicity** |  |  |
| Asian | 39 | 3.69 |
| Black | 396 | 37.43 |
| Brazilian indigenous | 21 | 1.98 |
| Brown | 500 | 47.26 |
| White | 102 | 9.64 |
| **Education (years)** |  |  |
| ≤ 8 | 522 | 49.34 |
| 9 to 11 | 472 | 44.61 |
| > 11 | 61 | 5.77 |
| Missing | 3 | 0.28 |
| **Marital status** |  |  |
| Without a partner | 180 | 17.01 |
| With a partner | 877 | 82.89 |
| Missing | 1 | 0.09 |
| **Employment status** |  |  |
| Without employment | 546 | 51.61 |
| With employment | 500 | 47.26 |
| Missing | 12 | 1.13 |
| **Family income** |  |  |
| ≤ 1 MW | 235 | 22.21 |
| > 1 MW | 774 | 73.16 |
| Missing | 49 | 4.63 |
| **Smoking during pregnancy** |  |  |
| No | 1007 | 95.18 |
| Yes | 37 | 3.50 |
| Missing | 14 | 1.32 |
| **Previous pregnancies** |  |  |
| < 2 | 828 | 78.26 |
| ≥ 2 | 227 | 21.46 |
| Missing | 3 | 0.28 |
| **Onset of prenatal care** |  |  |
| During the 1st trimester | 834 | 78.83 |
| After the 1st trimester | 170 | 16.07 |
| Missing | 54 | 5.10 |
| **Prenatal consultations** |  |  |
| ≤ 3 consultations | 647 | 61.15 |
| > 3 consultations | 389 | 36.77 |
| Missing | 22 | 2.08 |
| **History of miscarriage** |  |  |
| No | 689 | 65.12 |
| Yes | 226 | 21.36 |
| Missing | 143 | 13.52 |
| **Health problems†** |  |  |
| No | 520 | 49.15 |
| Yes | 525 | 49.62 |
| Missing | 13 | 1.23 |

MW: minimum wage (One minimum wage in 2013: R$ 678.00/US$ 301.33).

**†**Anemia, asthma, tuberculosis, pneumonia, diabetes, hypertension, kidney disease, urinary tract infection, and bleeding.

**Table S3.** Medication use by race. NISAMI Cohort Study, Brazil, 2012-2014 (N = 1,058).

|  | **Asian (n = 39)** | | **Black (n = 396)** | | **Brazilian indigenous (n = 21)** | | **Brown (n = 500)** | | **White (n = 102)** | |
| --- | --- | --- | --- | --- | --- | --- | --- | --- | --- | --- |
| **n** | **%** | **n** | **%** | **n** | **%** | **n** | **%** | **n** | **%** |
| **Medication use** |  |  |  |  |  |  |  |  |  |  |
| No | 1 | 2.56 | 68 | 17.17 | 1 | 4.76 | 77 | 15.40 | 19 | 18.63 |
| Yes | 38 | 97.44 | 328 | 82.83 | 20 | 95.24 | 423 | 84.60 | 83 | 81.37 |
| **Medication use according to *ANVISA’s* risk classification system** |  |  |  |  |  |  |  |  |  |  |
| A | 33 | 86.84 | 283 | 86.28 | 18 | 90.00 | 371 | 87.71 | 74 | 89.16 |
| B | 11 | 28.95 | 119 | 36.28 | 7 | 35.00 | 159 | 37.59 | 26 | 31.33 |
| C | 12 | 31.58 | 100 | 30.49 | 4 | 20.00 | 109 | 25.77 | 27 | 32.53 |
| D | 1 | 2.63 | 11 | 3.35 | 0 | 0.00 | 15 | 3.55 | 2 | 2.41 |
| X | 1 | 2.63 | 0 | 0.00 | 1 | 5.00 | 0 | 0.00 | 0 | 0.00 |
| **Potentially risky medication use in pregnancy (C, D, or X)**† |  |  |  |  |  |  |  |  |  |  |
| No | 26 | 68.42 | 226 | 68.90 | 16 | 80.00 | 308 | 72.81 | 55 | 66.27 |
| Yes | 12 | 31.58 | 102 | 31.10 | 4 | 20.00 | 115 | 27.19 | 28 | 33.73 |

†The denominator is the number of women who used medication during pregnancy by race.

**Table S4.** Prevalence of medication use during pregnancy by trimester according to race. NISAMI Cohort Study, Brazil, 2012-2014 (n = 892).

| **Medication use** | **Pregnant women** | | | | | | | | | | | |
| --- | --- | --- | --- | --- | --- | --- | --- | --- | --- | --- | --- | --- |
| **Total (n = 892)** | | **Asian (n = 38)** | | **Black (n = 328)** | | **Brazilian indigenous (n = 20)** | | **Brown (n = 423)** | | **White (n = 83)** | |
| **n** | **%** | **n** | **%** | **n** | **%** | **n** | **%** | **n** | **%** | **n** | **%** |
| **First trimester** |  |  |  |  |  |  |  |  |  |  |  |  |
| No | 205 | 22.98 | 13 | 33.33 | 80 | 20.20 | 7 | 33.33 | 89 | 17.80 | 16 | 15.69 |
| Yes | 676 | 75.78 | 25 | 64.10 | 244 | 61.62 | 13 | 61.90 | 327 | 65.40 | 67 | 65.69 |
| Missing | 11 | 1.23 | 0 | 0.00 | 4 | 1.01 | 0 | 0.00 | 7 | 1.40 | 0 | 0.00 |
| **Second trimester** |  |  |  |  |  |  |  |  |  |  |  |  |
| No | 486 | 54.48 | 15 | 38.46 | 176 | 44.44 | 8 | 38.10 | 237 | 47.40 | 50 | 49.02 |
| Yes | 395 | 44.28 | 23 | 58.97 | 148 | 37.37 | 12 | 57.14 | 179 | 35.80 | 33 | 32.35 |
| Missing | 11 | 1.23 | 0 | 0.00 | 4 | 1.01 | 0 | 0.00 | 7 | 1.40 | 0 | 0.00 |
| **Third trimester** |  |  |  |  |  |  |  |  |  |  |  |  |
| No | 826 | 92.60 | 37 | 94.87 | 303 | 76.52 | 18 | 85.71 | 391 | 78.20 | 77 | 75.49 |
| Yes | 55 | 6.17 | 1 | 2.56 | 21 | 5.30 | 2 | 9.52 | 25 | 5.00 | 6 | 5.88 |
| Missing | 11 | 1.23 | 0 | 0.00 | 4 | 1.01 | 0 | 0.00 | 7 | 1.40 | 0 | 0.00 |

**Table S5.** Prevalence of potentially risky medication use during pregnancy by trimester according to race. NISAMI Cohort Study, Brazil, 2012-2014 (n = 261).

| **Potentially risky medication use in pregnancy** | **Pregnant women** | | | | | | | | | | | |
| --- | --- | --- | --- | --- | --- | --- | --- | --- | --- | --- | --- | --- |
| **Total** | | **Asian** | | **Black** | | **Brazilian indigenous** | | **Brown** | | **White** | |
| **n** | **%** | **n** | **%** | **n** | **%** | **n** | **%** | **n** | **%** | **n** | **%** |
| **First trimester** |  |  |  |  |  |  |  |  |  |  |  |  |
| No | 485 | 71.75 | 17 | 68.00 | 171 | 70.08 | 11 | 84.62 | 237 | 72.48 | 49 | 73.13 |
| Yes | 188 | 27.81 | 8 | 32.00 | 73 | 29.92 | 2 | 15.38 | 87 | 26.61 | 18 | 26.87 |
| Missing | 3 | 0.44 | 0 | 0.00 | 0 | 0.00 | 0 | 0.00 | 3 | 0.92 | 0 | 0.00 |
| **Second trimester** |  |  |  |  |  |  |  |  |  |  |  |  |
| No | 332 | 84.05 | 19 | 82.61 | 123 | 83.11 | 10 | 83.33 | 156 | 87.15 | 24 | 72.73 |
| Yes | 61 | 15.44 | 4 | 17.39 | 24 | 16.22 | 2 | 16.67 | 22 | 12.29 | 9 | 27.27 |
| Missing | 2 | 0.51 | 0 | 0.00 | 1 | 0.68 | 0 | 0.00 | 1 | 0.56 | 0 | 0.00 |
| **Third trimester** |  |  |  |  |  |  |  |  |  |  |  |  |
| No | 48 | 87.27 | 1 | 100.00 | 20 | 95.24 | 2 | 100.00 | 20 | 80.00 | 5 | 83.33 |
| Yes | 7 | 12.73 | 0 | 0.00 | 1 | 4.76 | 0 | 0.00 | 5 | 20.00 | 1 | 16.67 |
| Missing | 0 | 0.00 | 0 | 0.00 | 0 | 0.00 | 0 | 0.00 | 0 | 0.00 | 0 | 0.00 |
